# Supplementary material
Source: ML conference proceedings conference paper supplement (https://aclanthology.org/2026.semeval-1.185)

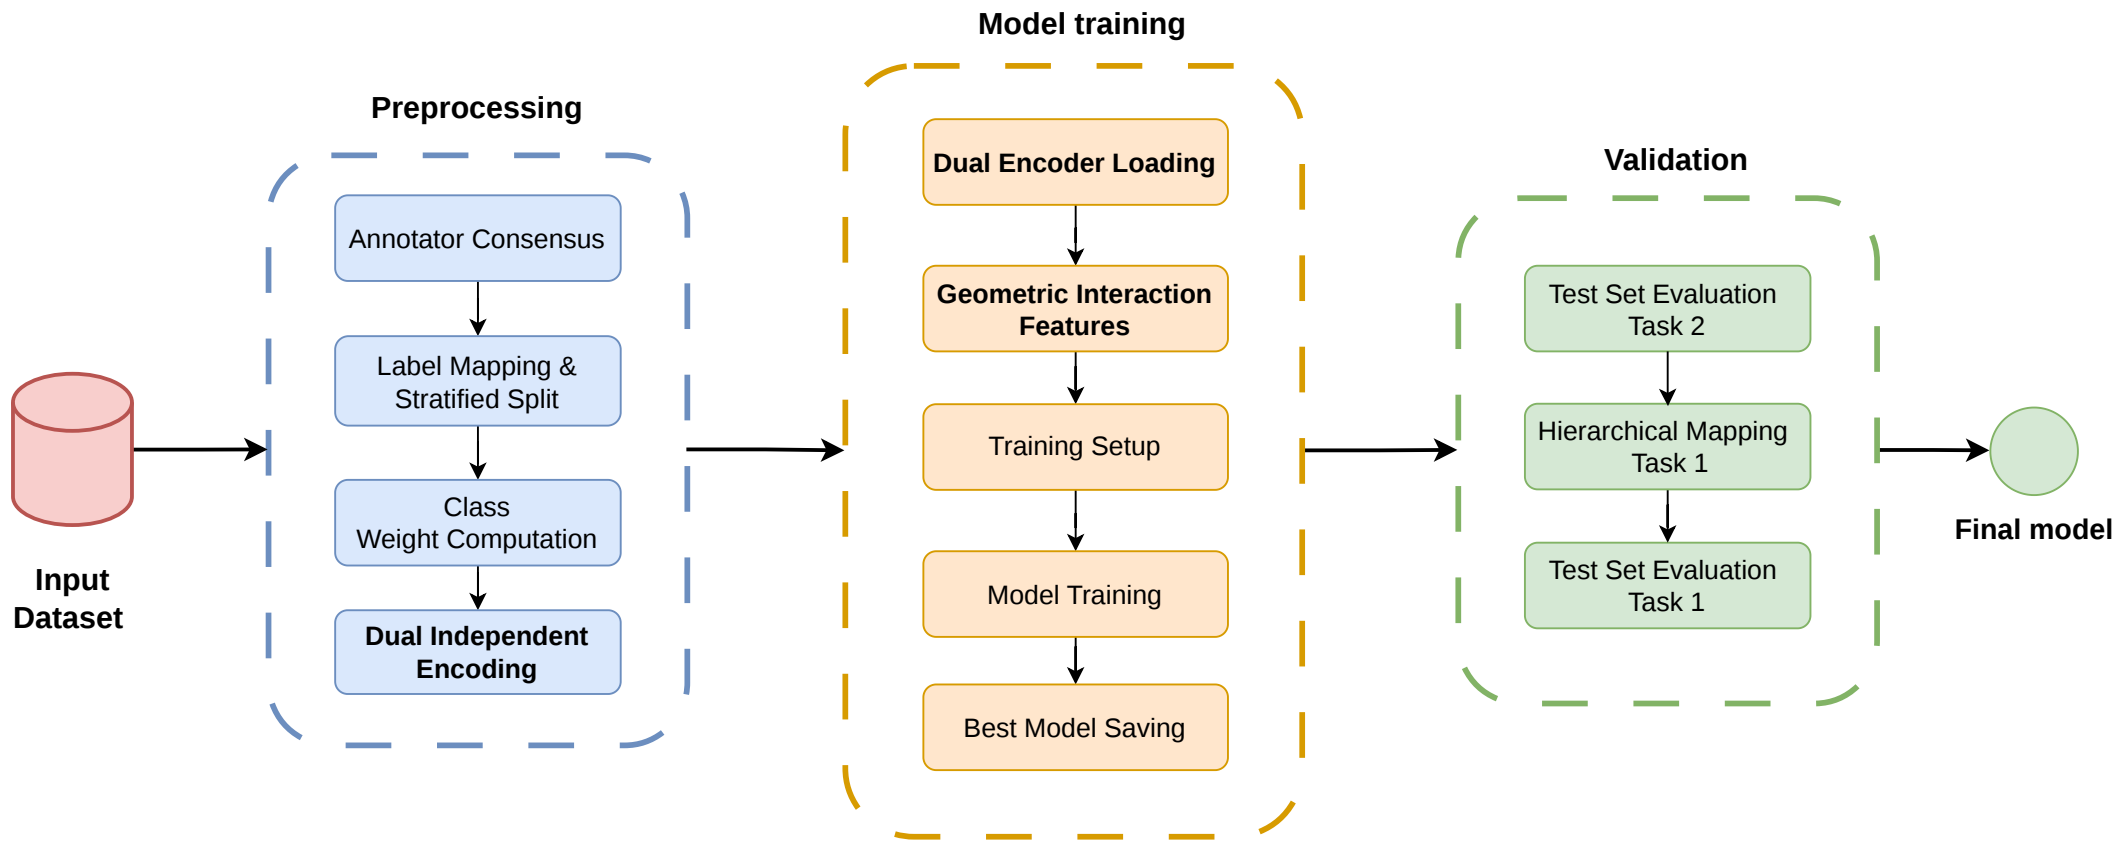

Supplement: SupplementaryMaterial [file Pipeline-Clarity-Interaction.pdf › assests/Pipeline-Clarity-Interaction.pdf]

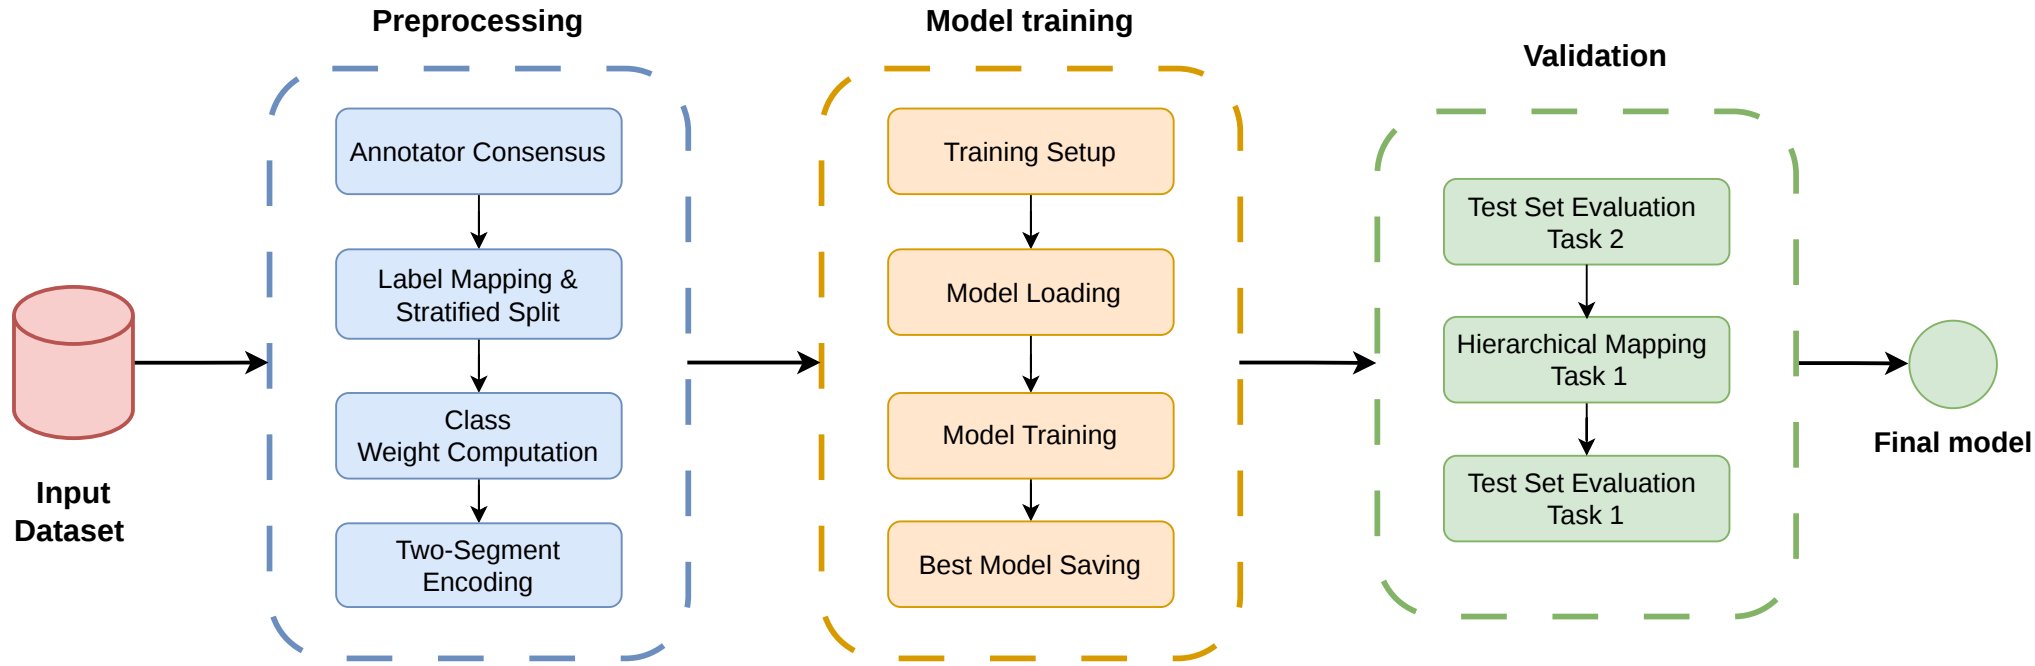

Supplement: SupplementaryMaterial [file Pipeline-Clarity.pdf › assests/Pipeline-Clarity.pdf]
